# Supplementary material
Source: PubMed Central journal article supplement (PMC5805635)

**Supplemental Figure 1: Prime boost immunization via heterologous routes with Ad vectors redirects CD8<sup>+</sup> T cell responses to the cervicovaginal mucosa.**

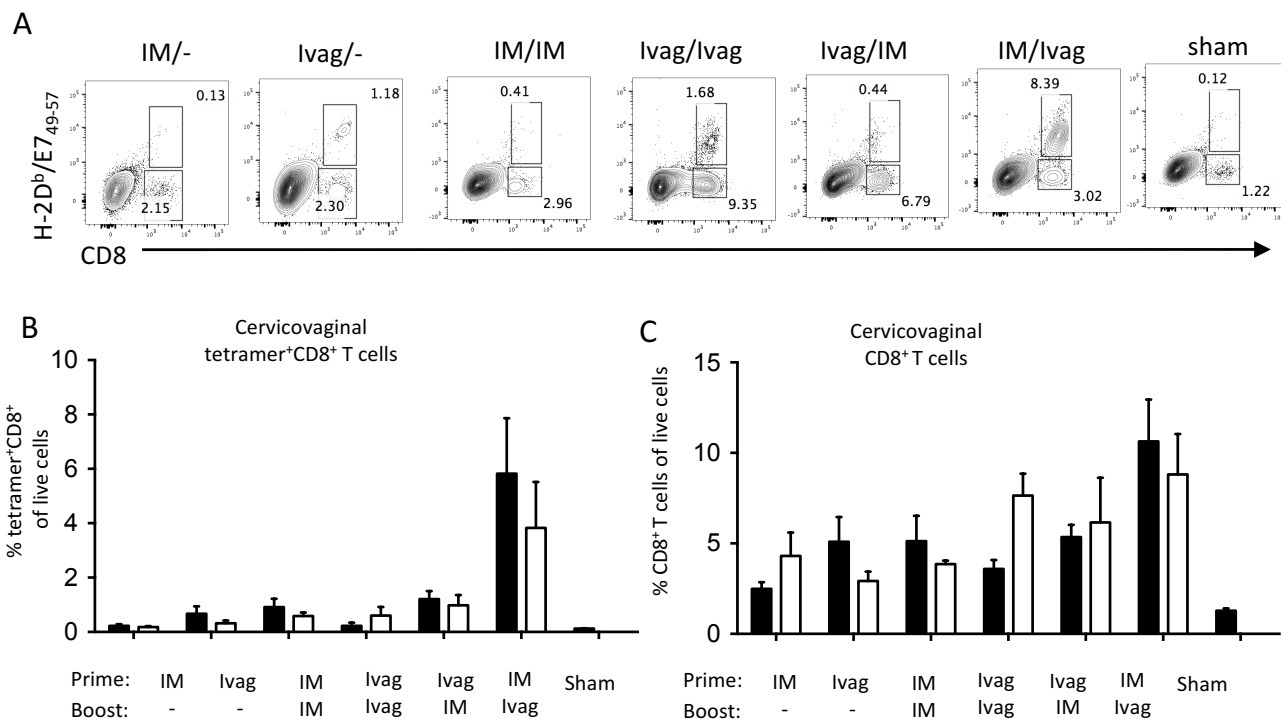

**Supplemental Figure 2: Analysis of cervicovaginal CD4<sup>+</sup> T cell responses after IM/lvag prime-boost immunization with Ad35 and Ad26 vectors**

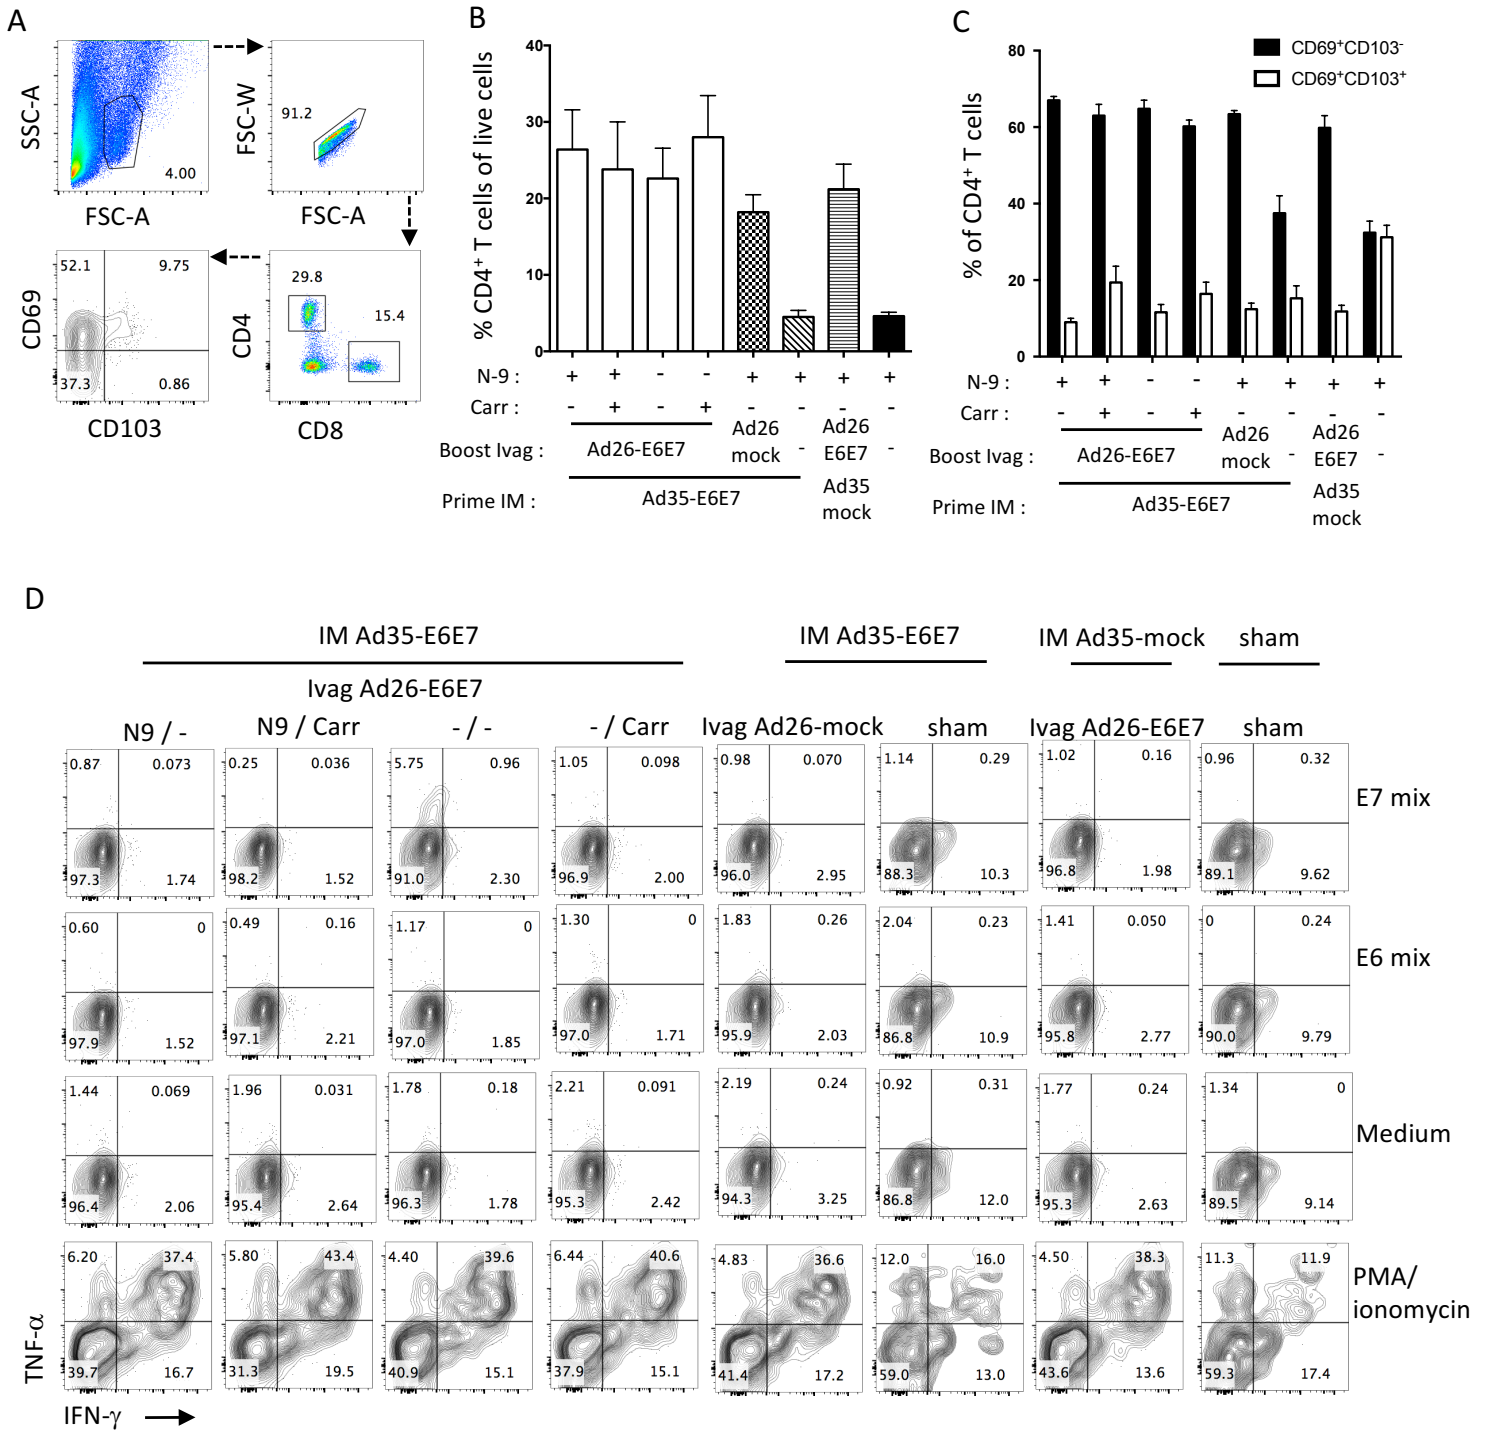

**Supplemental Figure 3: CD4-dependent induction of E7-specific CD8+ T cell responses after Ad26 Ivag. immunization**

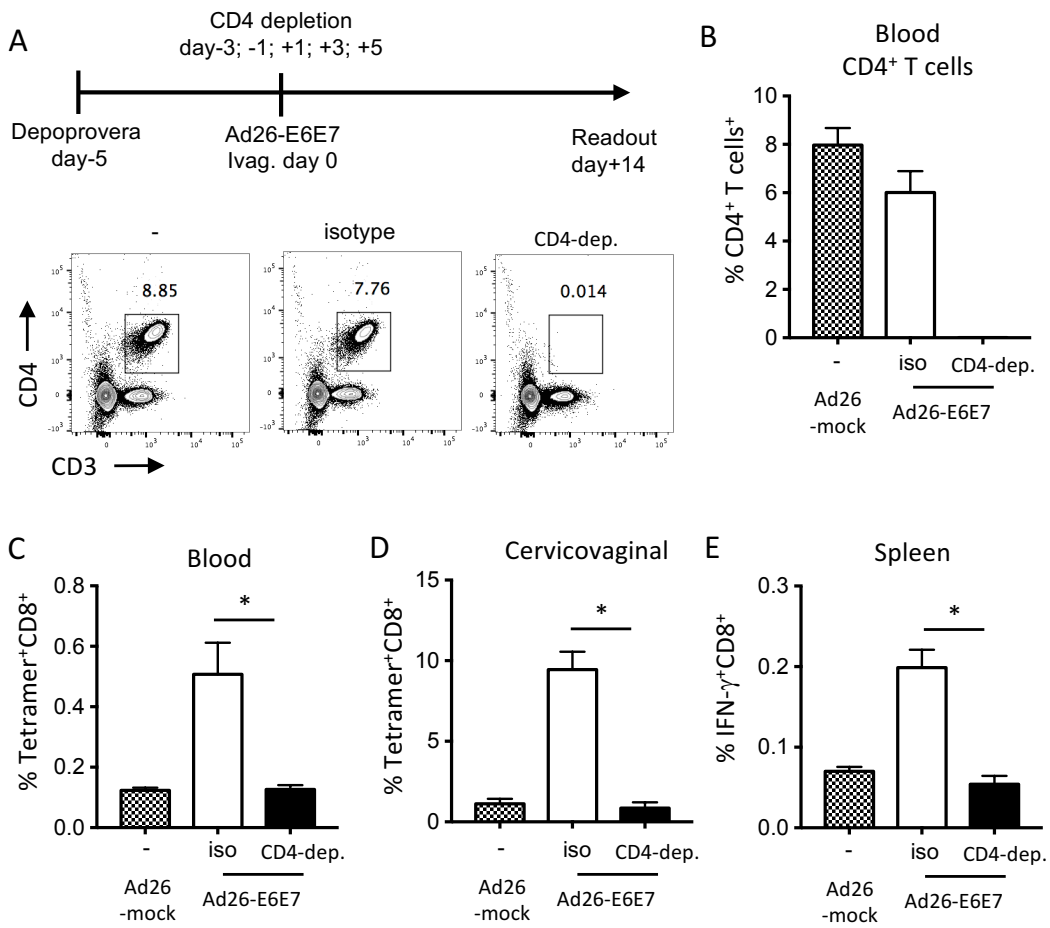

Supplement: NIHMS927205-supplement-Supp_Figures.pdf [file NIHMS927205-supplement-Supp_Figures.pdf]
